# Supplementary material for: Achieving long-term zero-thermal-quenching with the assistance of carriers from deep traps
Source: Royal Society of Chemistry journal article supplement (doi:10.1039/c8tc00511g), 2018-01-01
Supplement: c8tc00511g1.pdf [file c8tc00511g1.pdf]

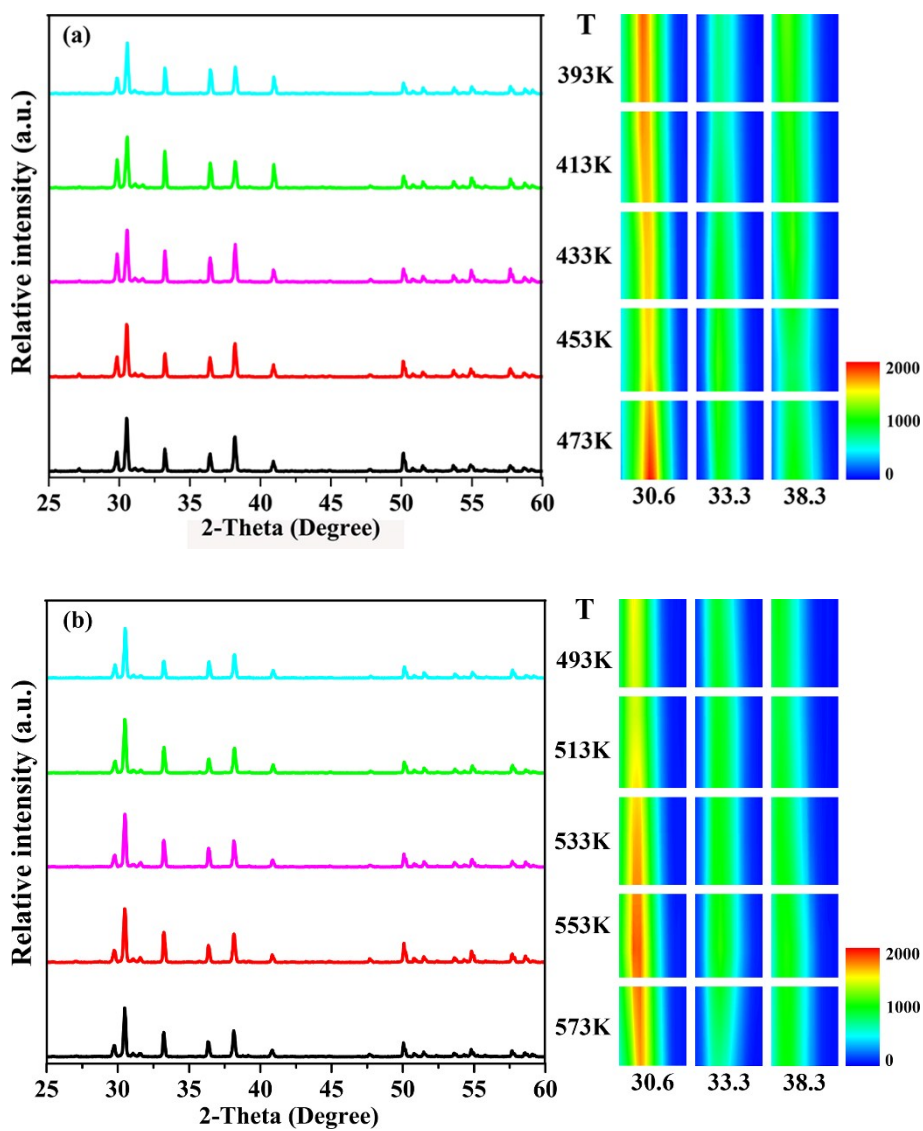

Fig. S1 In-suit XRD patterns of the SSET.

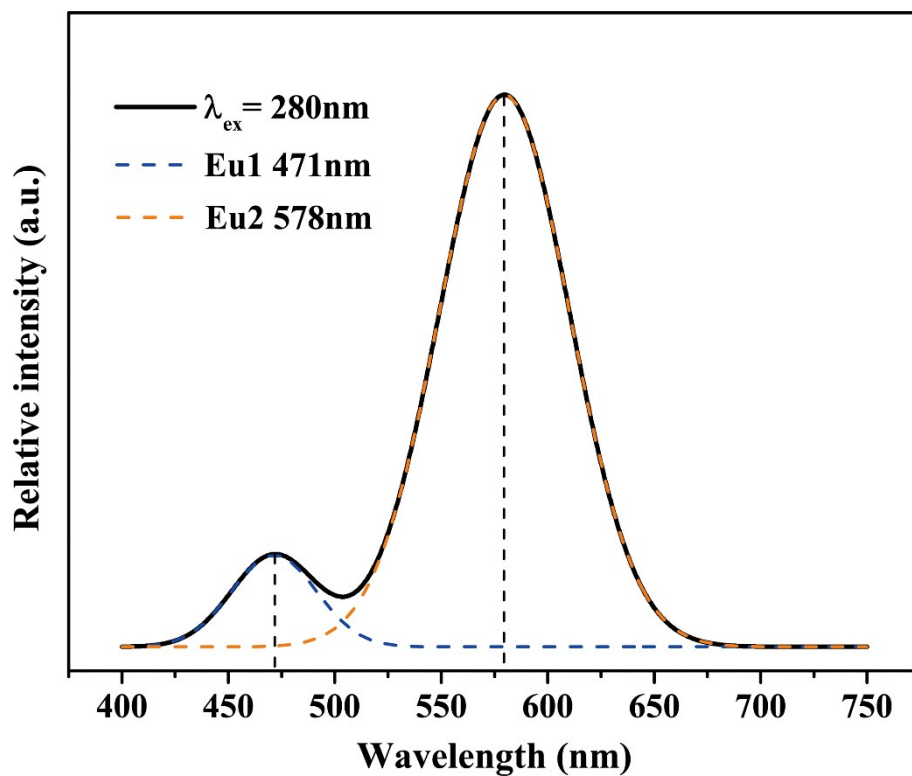

Fig. S2 PL spectrum of SSET under 280nm excitation.

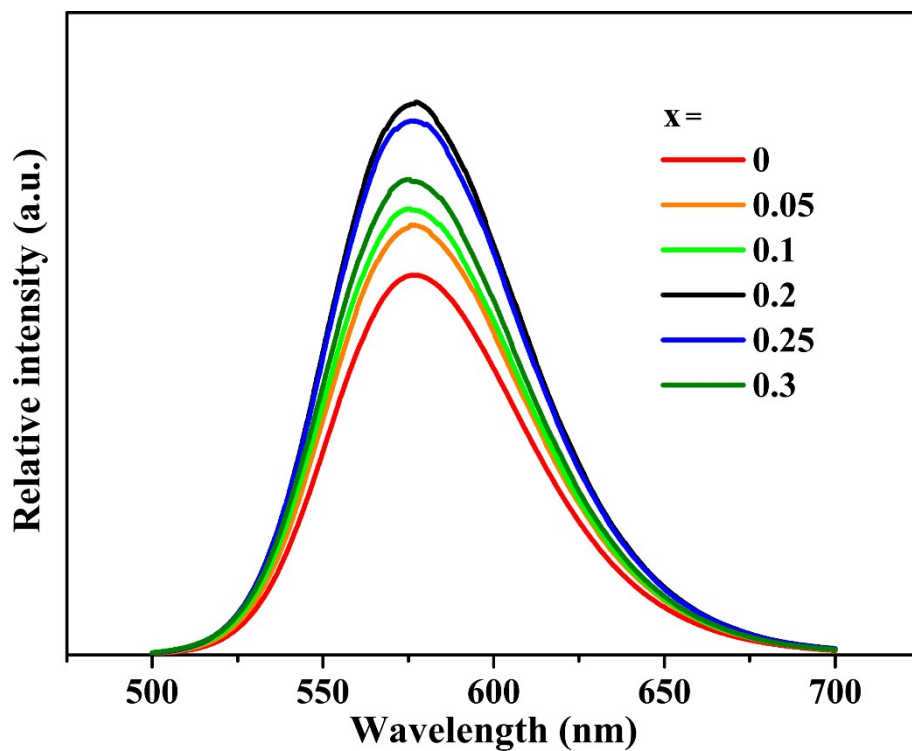

Fig. S3 PL spectra of  $\text{Sr}_{2.95-x}\text{SiO}_5: 0.5\text{Eu}^{2+}, x\text{Tm}^{3+}$  under 468nm excitation.

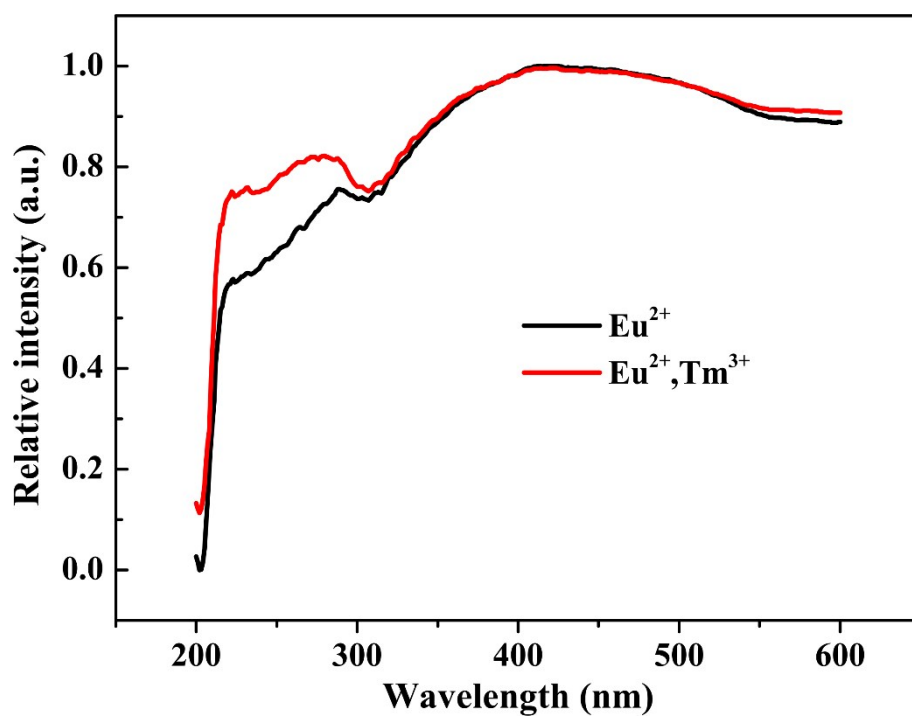

Fig. S4 Absorption spectra of SSE (black line) and SSET (red line).

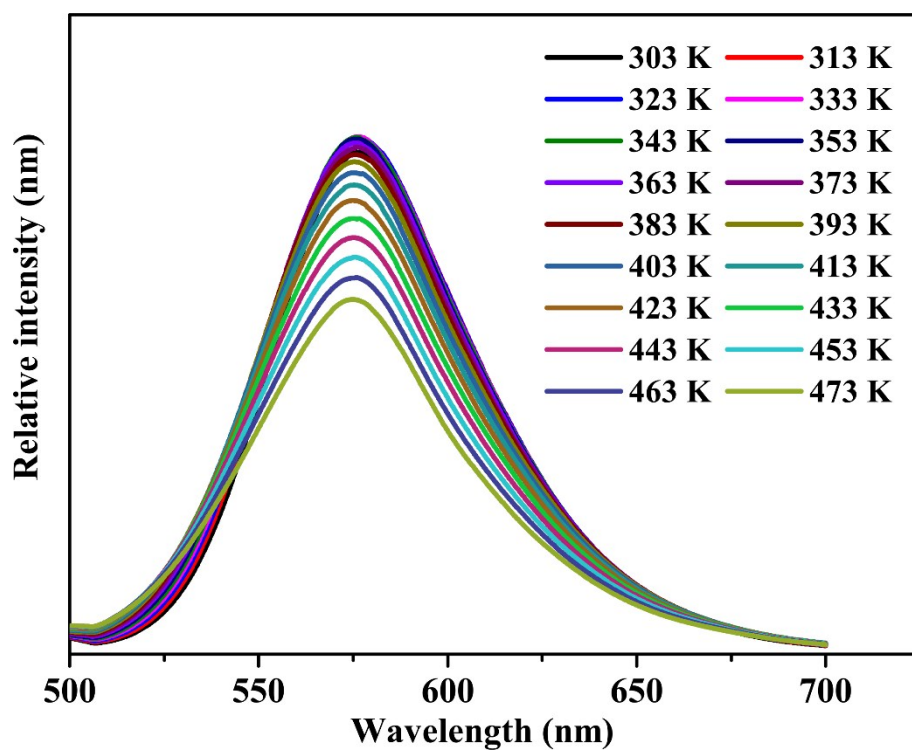

Fig. S5 Temperature-dependent PL spectra of SSET under 468 nm excitation.

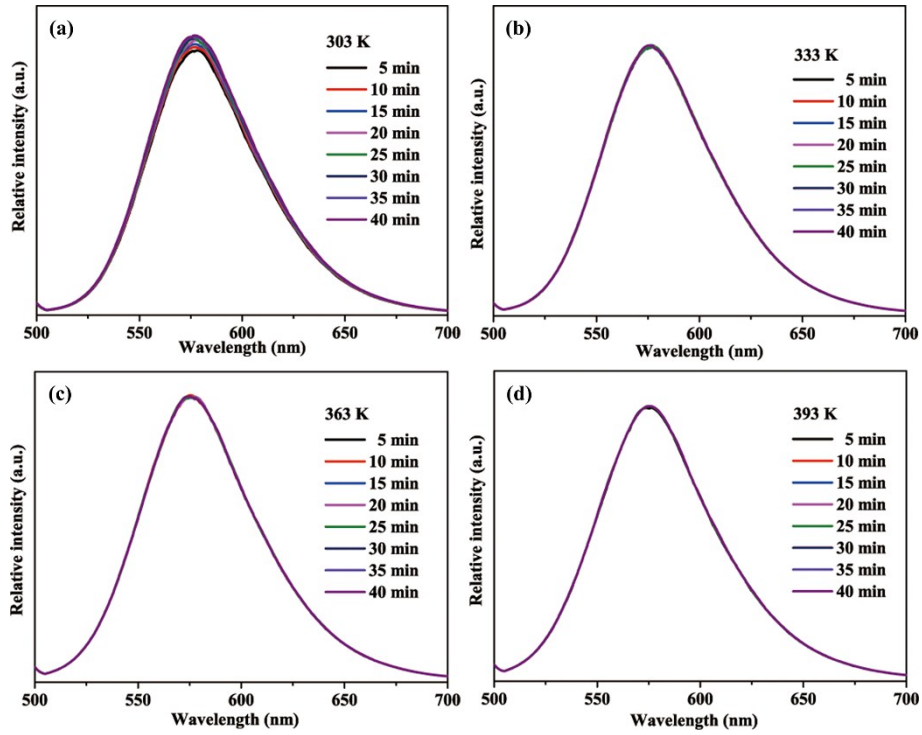

Fig. S6 PL spectra of SSET at different duration time and ambient temperature.

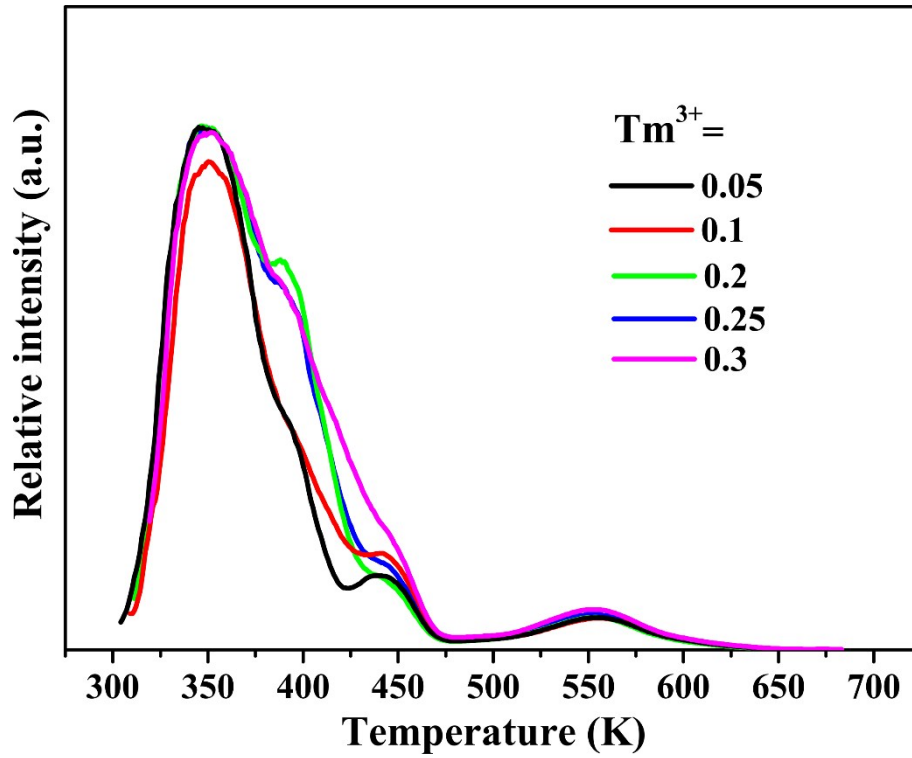

Fig. S7 TL curves of SSET.

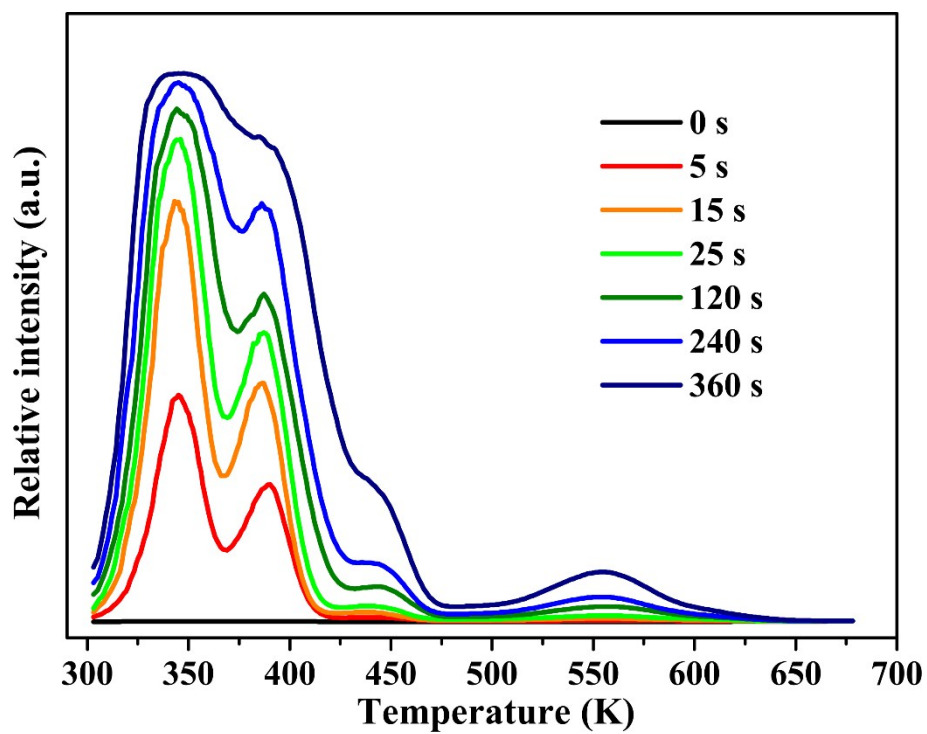

Fig. S8 Duration-dependent TL curves of SSET.

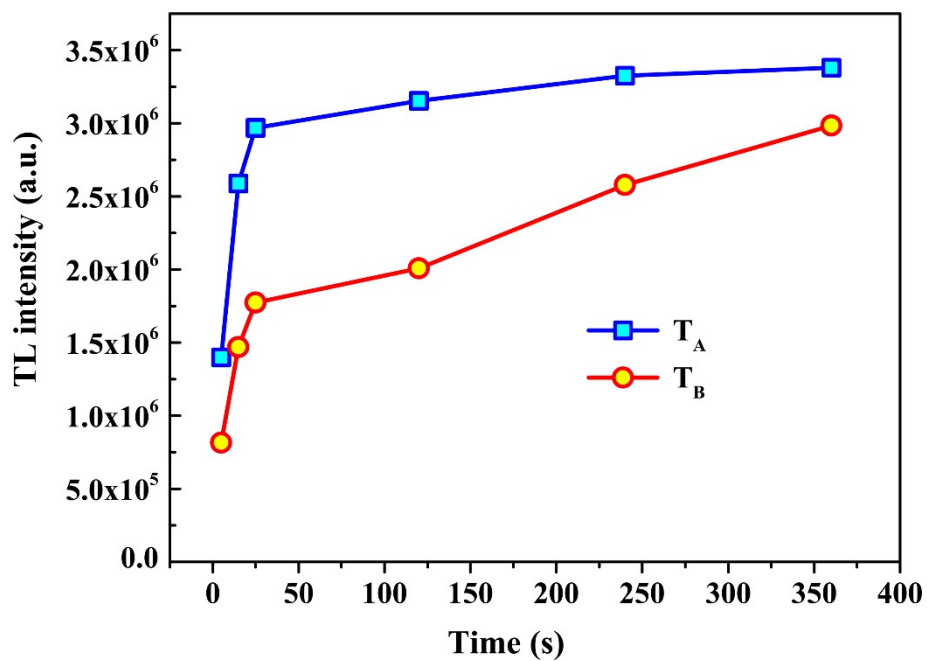

Fig. S9 TL intensity of T<sub>A</sub> and T<sub>B</sub> dependent on duration time.

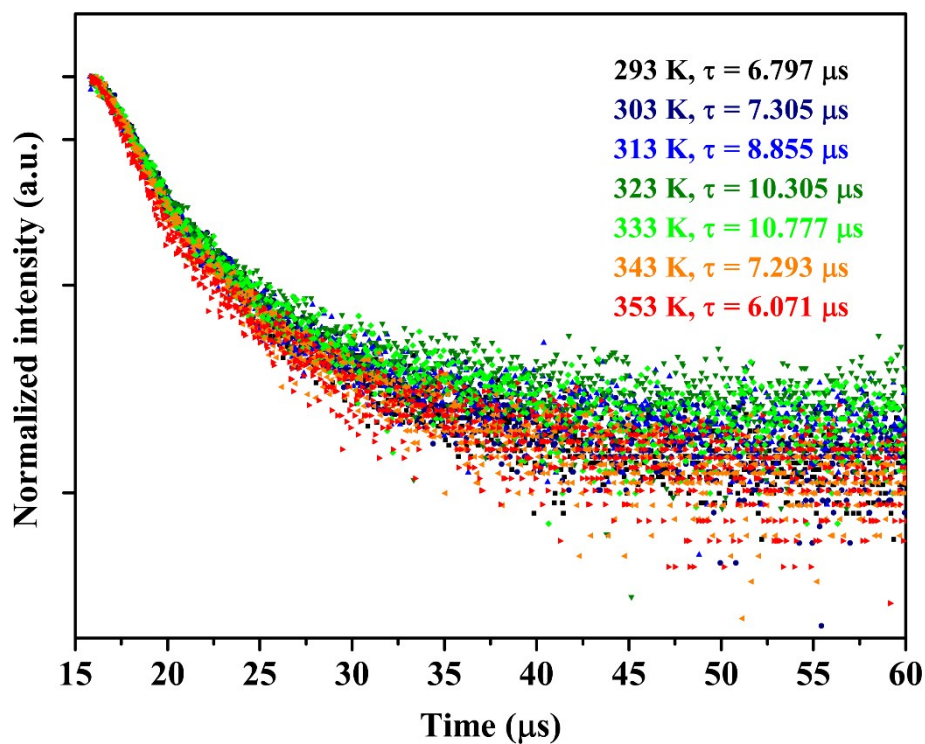

Fig. S10 Temperature-dependent decay curves of SSET.

The fluorescence decay curves are fitted by a double-exponential function:

$$I = A_1 \exp(-t/\tau_1) + A_2 \exp(-t/\tau_2)$$

Where I is the fluorescence intensity, A is a constant, t is the time,  $\tau_1$  and  $\tau_2$  are the decay times. The effective lifetime  $\tau$  of 578 nm emission can be calculated by following equation:

$$\tau = (A_1 \tau_1^2 + A_2 \tau_2^2) / (A_1 \tau_1 + A_2 \tau_2)$$

Table. S1 Refinement parameters of Sr<sub>3</sub>SiO<sub>5</sub>: Eu<sup>2+</sup>, Tm<sup>3+</sup>

| Refinement parameters of SSET |               |
|-------------------------------|---------------|
| Symmetry                      | Tetragonal    |
| Space group                   | <i>P4/ncc</i> |
| <i>a</i> /Å                   | 6.9548(2)     |
| <i>c</i> /Å                   | 10.7677(6)    |
| volume/Å <sup>3</sup>         | 520.83(1)     |
| <i>Z</i>                      | 4             |
| <i>R</i> <sub>b</sub> (%)     | 16.32         |
| <i>R</i> <sub>wp</sub> (%)    | 12.57         |
| $\chi^2$                      | 1.29          |

Table. S2 Structure parameters of Sr<sub>3</sub>SiO<sub>5</sub>.

| Atomic parameters |     |                  |            |            |            |
|-------------------|-----|------------------|------------|------------|------------|
| Atom.             | Ox. | Wyckoff position | <i>x/a</i> | <i>y/b</i> | <i>z/c</i> |
| Sr1               | +2  | 8 <i>f</i>       | 0.1810(0)  | 0.1810(0)  | 0.25       |
| Sr2               | +2  | 4 <i>c</i>       | 0          | 0.5        | 0          |
| Si                | +4  | 4 <i>b</i>       | 0          | 0          | 0          |
| O1                | -2  | 16 <i>g</i>      | 0.1690(0)  | -0.0920(0) | 0.0880(0)  |
| O2                | -2  | 4 <i>c</i>       | 0          | 0.5        | 0.25       |
